# Supplementary material for: Hybrid of non-selective quantum dots for simultaneous determination of TNT and 4-nitrophenol using multivariate chemometrics methods
Source: Royal Society of Chemistry journal article supplement (doi:10.1039/c4ay01326c), 2014-01-01
Supplement: c4ay01326c1.pdf [file c4ay01326c1.pdf]

## Supplementary information

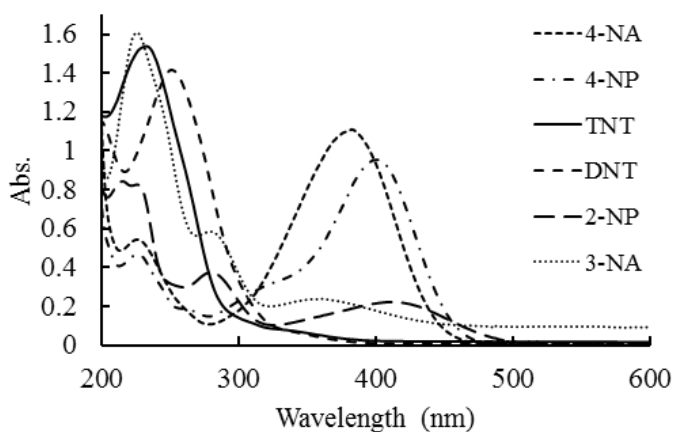

Fig. S1. Absorption Spectra of different nitro-compound at the same concentration (pH=7.4).

Table S1. The Stern-Volmer constants and R-square values for CQDs and CdTe QDs in the presence of nitro-compounds.

|      | CQD      |        | CdTe     |        |
|------|----------|--------|----------|--------|
|      | $K_{SV}$ | $R^2$  | $K_{SV}$ | $R^2$  |
| 2-NP | 0.0037   | 0.9969 | 0.0093   | 0.9673 |
| 3-NA | 0.0038   | 0.9910 | 0.0098   | 0.9808 |
| 4-NA | 0.0262   | 0.9910 | 0.0401   | 0.9823 |
| 4-NP | 0.0171   | 0.9961 | 0.0255   | 0.9862 |
| DNT  | 0.0011   | 0.9734 | 0.0260   | 0.9890 |
| TNT  | 0.0013   | 0.9927 | 0.0523   | 0.9409 |

## M-file

All calculations were performed in MATLAB 7.5.0. As an example, the program codes (M-file) used to simulate the fluorescence quenching data sets for *case II* in the [Table 1](#) and with the spectral overlapping in the emission spectra is presented in the following M-file. This M-file simulate the fluorescence quenching of  $F1$ ,  $F2$  and hybrid of  $F1-F2$  in the presence of  $Q1$  (using eq. (2)) and in the presence of both  $Q1$  and  $Q2$  (using eq. (3)).

```
clear
clc
x=400:700;           % wavelength (nm)
I0(1,:)=gaussmf(x,[40 510]); % emission spectra of F1
I0(2,:)=gaussmf(x,[40 590]); % emission spectra of F2
Ksv11=2;             % Stern-Volmer constant for complex formation of F1 with Q1
Ksv12=0.5;          % Stern-Volmer constant for complex formation of F1 with Q2
Ksv21=0.5;          % Stern-Volmer constant for complex formation of F2 with Q1
Ksv22=2;             % Stern-Volmer constant for complex formation of F2 with Q2

%%%%% fluorescence quenching of F1, F2 and hybrid of F1-F2 in the presence of Q1
Q1=[0:0.1:1]';      % concentration of Q1

for i=1:length(Q1)
    I_F1(i,:)=I0(1,:)/(1+Ksv11*Q1(i));
    I_F2(i,:)=I0(2,:)/(1+Ksv21*Q1(i));
    I_hybride(i,:)= I_F1(i,:)+I_F2(i,:);
end

figure(1),plot(x, I_F1,'b'), title('fluorescence quenching of F1 in the presence of Q1')
figure(2),plot(x, I_F2,'b'), title('fluorescence quenching of F2 in the presence of Q1')
figure(3),plot(x, I_hybride,'b'), title('fluorescence quenching of F1-F2 hybrid in the presence of Q1')

%%%%% fluorescence quenching of hybrid of F1-F2 in the presence of Q1 and Q2
%%%%% 36 spectrum according to a full factorial design for six concentration levels of Q1 and Q2
Q1=[0:0.2:1]';      % concentration of Q1
Q2=[0:0.2:1]';      % concentration of Q2
[C1,C2]=meshgrid(Q1,Q2);

for i=1:length(C1(:))
    I_F1(i,:)=I0(1,:)/(1+Ksv11*C1(i)+ Ksv12*C2(i));
    I_F2(i,:)=I0(2,:)/( 1+Ksv21*C1(i)+ Ksv22*C2(i));
    I_hybride(i,:)= I_F1(i,:)+I_F2(i,:);
end

figure(4),plot(x, I_F1,'b'), title('fluorescence quenching of F1 in the presence of Q1 and Q2')
figure(5),plot(x, I_F2,'b'), title('fluorescence quenching of F2 in the presence of Q1 and Q2')
figure(6),plot(x, I_hybride,'b'), title('fluorescence quenching of F1-F2 hybrid in the presence of Q1 and Q2')
```

For simulating the data with different selectivity and spectral overlapping cases, the values of  $K_{sv}$  and peak maxima of the spectra were changed according to the [Table 1](#) and [Fig. 1](#), respectively. For simulating of validation set the concentration of Q1 and Q2 were changed to [0.1; 0.3; 0.5]. White noise with a standard deviation of 0.1% of the maximum values of data was added to all simulated data sets. ( $\mathbf{I}=\mathbf{I}+(\mathbf{0.001}*\mathbf{max(max(I))*randn(size(I))})$ )
